# Supplementary material for: Dendritic CdS assemblies for removal of organic dye molecules
Source: Royal Society of Chemistry journal article supplement (doi:10.1039/c3dt53256a), 2013-12-18
Supplement: c3dt53256a.pdf [file c3dt53256a.pdf]

## Supporting Information

### **Dendritic CdS assembles for removal of organic dye molecules**

Zhou Yu<sup>a</sup>, Yang Jiao<sup>a</sup>, Yang Liu<sup>a</sup>, Fengyu Qu<sup>a,\*</sup>, Guangshan Zhu<sup>b</sup>, Xiang Wu<sup>a,\*</sup>

<sup>a</sup>Key Laboratory for Photonic and Electronic Bandgap Materials, Ministry of Education and College of Chemistry and Chemical Engineering, Harbin Normal University, Harbin 150025, P. R. China

<sup>b</sup>State Key Laboratory for Inorganic Synthesis and Preparative Chemistry, Jilin University, Changchun 130023, P. R. China

Author to whom correspondences should be addressed:

E-mail: wuxiang05@gmail.com and qufengyu@hrbnu.edu.cn

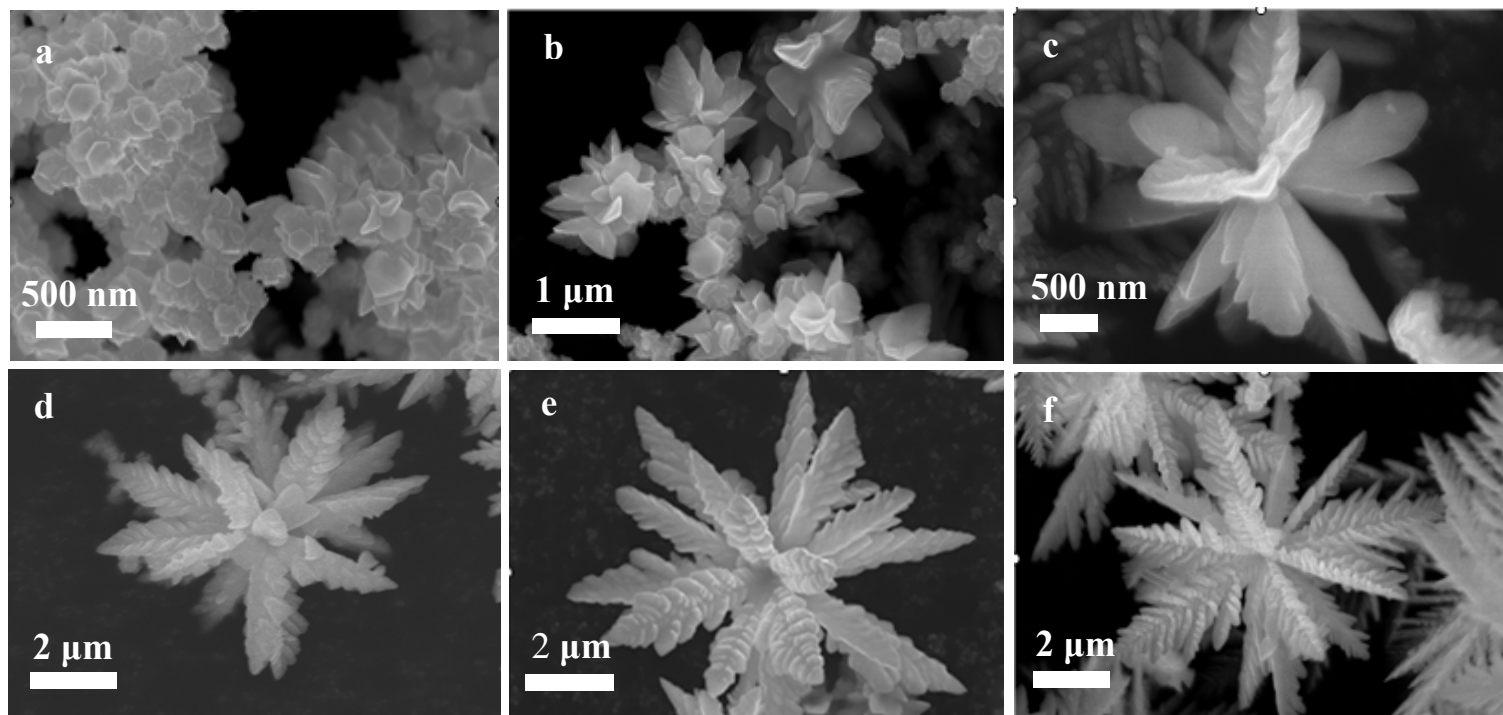

Figure S1 SEM images of the prepared samples at different temperatures: (a) 0.5h (b) 1h (c) 3 h (d) 5h (e) 8h (f) 10h

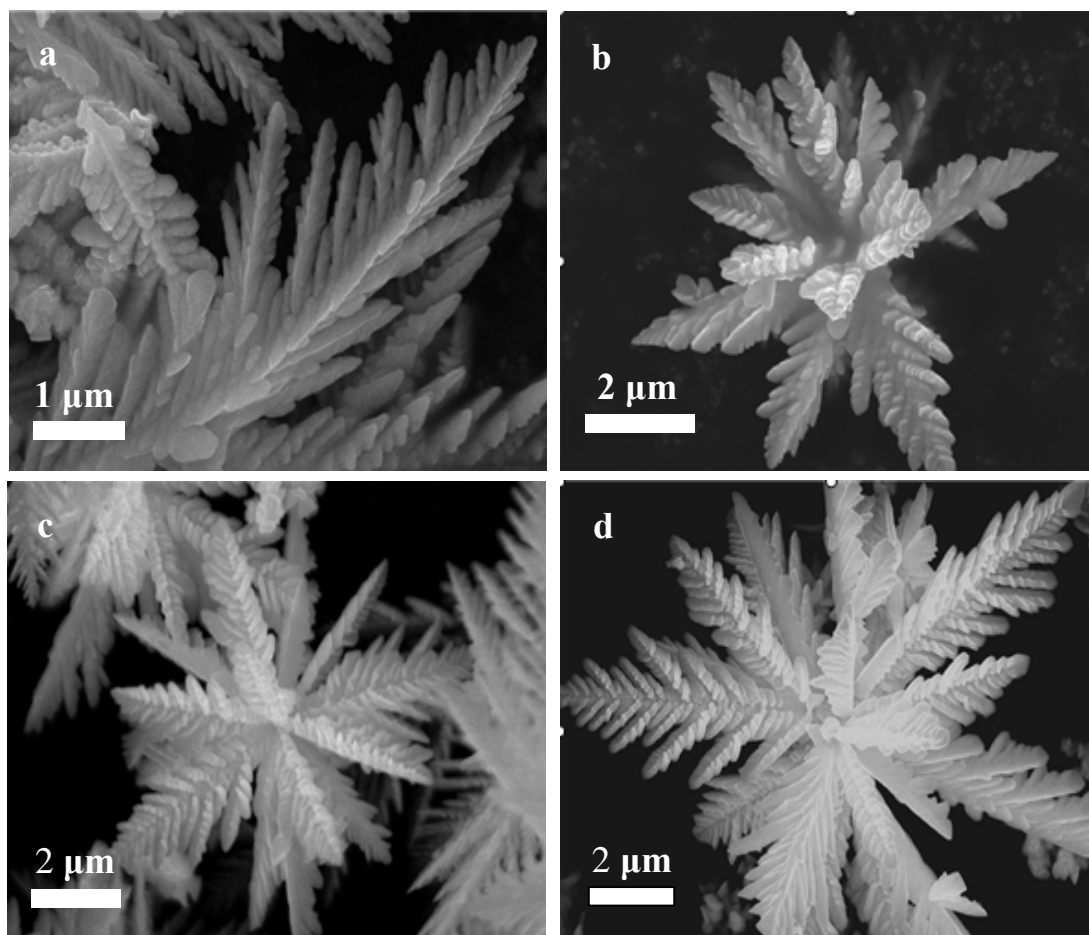

Figure S2 The as-synthesized products in the presence of different quantities of DMSO at 160 °C for 10 h: (a) 0 ml (b) 0.1ml (c) 0.2ml (d) 0.3 ml
